# Supplementary material for: Exome-wide association study identifies a TM6SF2 variant that confers susceptibility to nonalcoholic fatty liver disease
Source: Springer Nature journal article supplement (doi:10.1038/ng.2901), 2014-02-16
Supplement: 41588_2014_BFng2901_MOESM6_ESM.pdf [file 41588_2014_BFng2901_MOESM6_ESM.pdf]

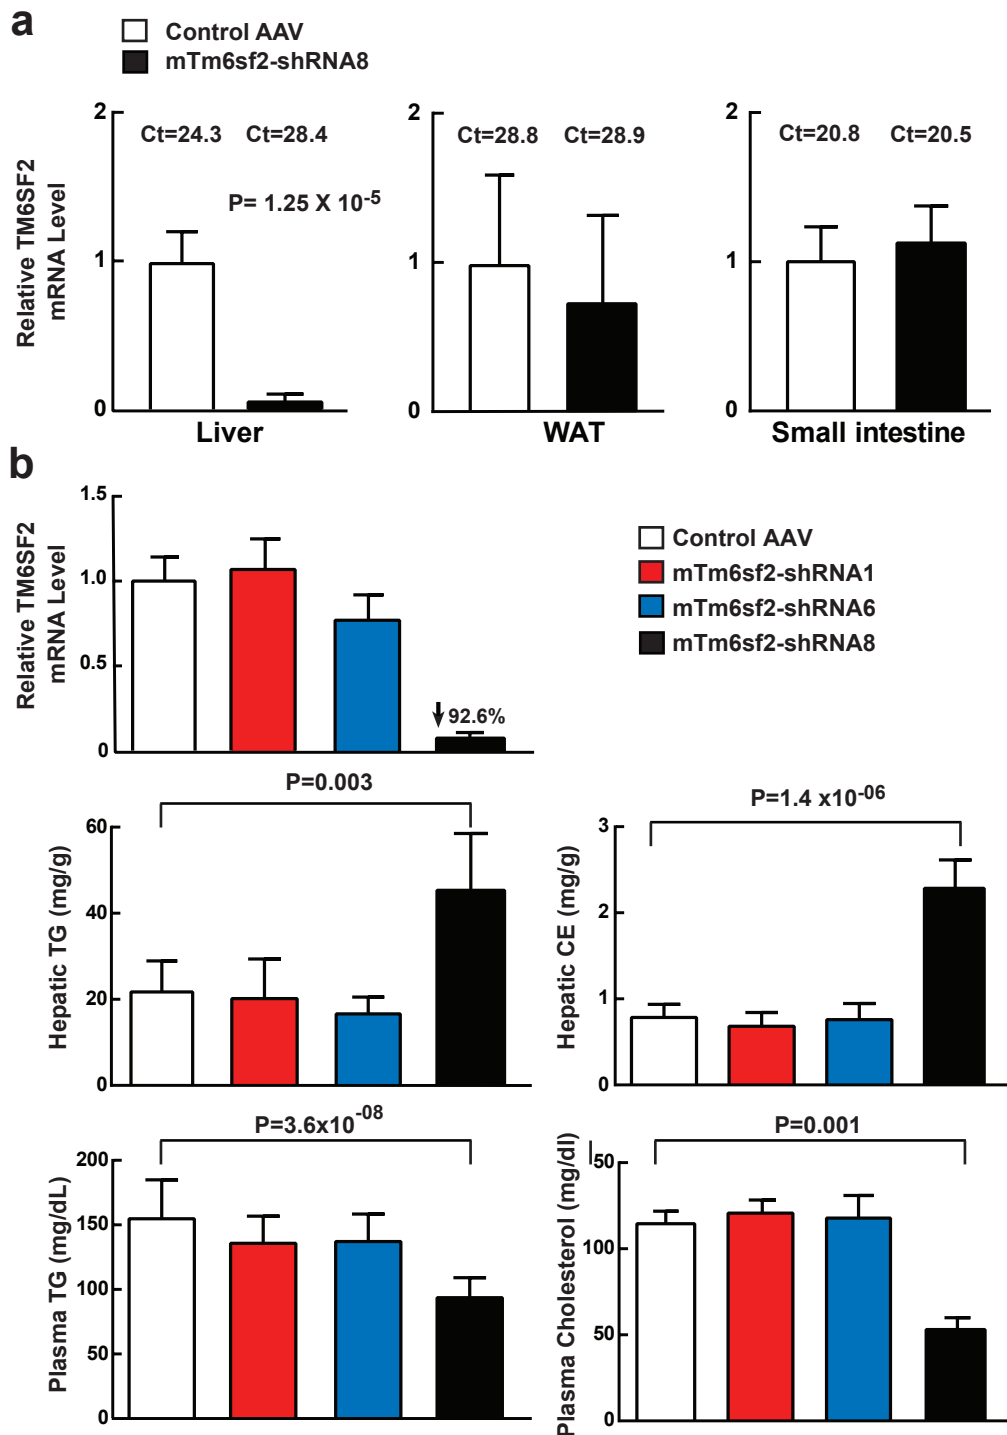

**Supplementary Fig. 1** Short hairpin RNA-mediated knockdown of Tm6sf2 in mice. (a) AAV vector alone or AAV expressing a shRNA directed against mTm6sf2 mRNA were injected into the tail veins of 8 week old chow-fed C57Bl/6J male mice ( $n=5$ /group). After two weeks, the mice were killed and the liver, white adipose tissue (WAT) and small intestine were harvested. Levels of Tm6sf2 mRNA were measured using Real-Time PCR and normalized to m36B4 levels. The differences in mean expression levels were compared using a two sample t-test. (b) AAV expressing 3 different shRNAs or AAV vector alone were injected intravenously into 8-week old chow-fed C57BL/6J male mice ( $n=6$ /group). All three shRNAs were directed against mouse Tm6sf2, but only shRNA8 knocked down the levels of Tm6sf2 mRNA with high efficiency in cultured cells. Two weeks after the injection, mice were fasted for 4 h, the livers were harvested and the levels of TM6SF2 mRNA were measured using Real-Time PCR. Values were normalized to m36B4, and expressed relative to the mean value of the AAV-only treated mice. Plasma was collected in the same experiment and TG and cholesterol levels measured as described in Methods. Differences in mean expression levels were compared using a two-sample T-tests. Ct, cycle threshold value.

**Supplementary Table 1 Characteristics of Dallas Heart Study participants stratified by *TM6SF2* (E167K) genotype.**

| Characteristic                                    | EE <sup>a</sup> | EK            | KK              | P-value <sup>b</sup>  |
|---------------------------------------------------|-----------------|---------------|-----------------|-----------------------|
| Total n                                           | 4,151           | 423           | 13              | -                     |
| Female, n (%)                                     | 2,389 (57.6)    | 225 (53.2)    | 9 (69.2)        | 0.16                  |
| Ethnicity <sup>c</sup> , n (%)                    |                 |               |                 |                       |
| Non-Hispanic African-American                     | 2,203 (53.1)    | 160 (37.8)    | 2 (15.4)        | $2.1 \times 10^{-10}$ |
| Non-Hispanic European-American                    | 1,169 (28.2)    | 174 (41.1)    | 11 (84.6)       | $3.9 \times 10^{-11}$ |
| Hispanic                                          | 676 (16.3)      | 69 (16.3)     | 0 (0)           | 0.35                  |
| Other                                             | 103 (2.5)       | 20 (4.7)      | 0 (0)           | 0.029                 |
| Age, years (mean)                                 | 45 ± 11         | 44 ± 11       | 50 ± 12         | 0.73                  |
| Body-mass index, kg/m <sup>2</sup>                | 29.6 (26-35)    | 28.5 (26-34)  | 31.8 (28-34)    | 0.95                  |
| Diabetes <sup>d</sup> , n (%)                     | 523 (12.6)      | 37 (8.7)      | 2 (16.7)        | 0.14                  |
| Alcohol consumption <sup>e</sup> >20 g/day, n (%) | 334 (8.1)       | 48 (11.4)     | 1 (7.7)         | 0.058                 |
| Lipid-lowering medication (statins), n (%)        | 359 (8.8)       | 33 (8.0)      | 0 (0)           | 0.17                  |
| HDL-cholesterol (mg/dL)                           | 50.6 ± 14.9     | 49.9 ± 14.0   | 50.2 ± 18.8     | 0.98                  |
| HOMA-IR (U) <sup>f</sup>                          | 3.0 (2-5)       | 2.9 (2-5)     | 4.6 (2-8)       | 0.52                  |
| Fasting glucose (mg/dL) <sup>g</sup>              | 91 (84-98)      | 91 (85-99)    | 94 (86-104)     | 0.15                  |
| Gamma-glutamyl transpeptidase (IU/L)              | 23 (17-36)      | 24 (16-38)    | 22 (12-28)      | 0.51                  |
| Bilirubin (mg/dL)                                 | 0.5 (0.4-0.7)   | 0.5 (0.4-0.7) | 0.6 (0.5-0.8)   | 0.92                  |
| HTGC (%) <sup>h</sup>                             | 3.5 (1.9-6.7)   | 4.4 (2.2-9.9) | 15.7 (8.8-18.4) | $5.6 \times 10^{-7}$  |

Values are median (interquartile range), mean ± s.d., or number (%). <sup>a</sup>Missense variant (E167K) in *TM6SF2*. <sup>b</sup>P-values were calculated using linear regression for continuous variables (age, body-mass index, glucose, HOMA-IR) and logistic regression for categorical variables (gender, ethnicity, diabetes diagnosis, alcohol consumption, and use of lipid-lowering drugs). Regression models were adjusted for age, gender, ethnicity, and BMI (where appropriate). <sup>c</sup>Ethnicity was self-reported as described in the Methods. <sup>d</sup>Diabetes was defined as a self-reported diagnosis of diabetes, use of prescription medication, fasting glucose ≥ 126 mg/dL or non-fasting glucose ≥ 200 mg/dL or HbA1c ≥ 6.5%. <sup>e</sup>Alcohol consumption was self-reported. <sup>f</sup>HOMA-IR, homeostatic model assessment of insulin resistance was calculated as described in the Methods. <sup>g</sup>Diabetics excluded. <sup>h</sup>P-value after adjustment for HOMA-IR, alcohol consumption and covariates listed above.

**Supplementary Table 2 Conditional association analysis for variants in the chromosome 19 region including *NCAN*, *TM6SF2*, *SUGP1*, *CILP2*, and *PBX4***

| Locus       | SNP                 | MAF (%) | Median Hepatic TG %<br>by genotype |     |      | Beta   | <i>P</i><br>Uncondi-<br>tional | <i>P</i> <sub>SNP</sub> condi-<br>tional on<br>rs58542926 | <i>P</i> <sub>rs58542926</sub><br>conditional<br>on SNP |
|-------------|---------------------|---------|------------------------------------|-----|------|--------|--------------------------------|-----------------------------------------------------------|---------------------------------------------------------|
|             |                     |         | 0                                  | 1   | 2    |        |                                |                                                           |                                                         |
| NCAN        | rs2228603 (P92S)    | 3.7     | 3.5                                | 3.9 | 12.0 | 0.076  | 0.002                          | 0.79                                                      | $1.3 \times 10^{-5}$                                    |
| NCAN        | rs150701551 (V548L) | 0.64    | 3.6                                | 3.3 | -    | 0.033  | 0.57                           | 0.52                                                      | $5.5 \times 10^{-8}$                                    |
| NCAN        | rs10426537 (S838N)  | 3.9     | 3.6                                | 2.8 | 3.2  | -0.060 | 0.013                          | 0.015                                                     | $6.8 \times 10^{-8}$                                    |
| NCAN        | rs1064395           | 29.7    | 3.7                                | 3.5 | 3.1  | 0.007  | 0.51                           | 0.20                                                      | $3.1 \times 10^{-8}$                                    |
| TM6SF2      | rs58542926 (E167K)  | 5.0     | 3.5                                | 4.5 | 15.7 | 0.115  | $5.7 \times 10^{-8}$           | NA                                                        | NA                                                      |
| SUGP1       | rs10401969          | 12.4    | 3.6                                | 3.6 | 3.3  | 0.035  | 0.014                          | 0.26                                                      | $7.2 \times 10^{-7}$                                    |
| SUGP1       | rs17751061 (R290H)  | 7.9     | 3.5                                | 3.9 | 2.4  | 0.021  | 0.24                           | 0.12                                                      | $3.7 \times 10^{-8}$                                    |
| SUGP1       | rs138023808 (D104D) | 0.7     | 3.6                                | 3.3 | -    | 0.027  | 0.62                           | 0.56                                                      | $5.5 \times 10^{-8}$                                    |
| CILP2, PBX4 | rs16996148          | 11.8    | 3.6                                | 3.3 | 5.0  | 0.025  | 0.084                          | 0.22                                                      | $1.2 \times 10^{-7}$                                    |
| CILP2, PBX4 | rs17216525          | 5.3     | 3.5                                | 4.2 | 18.1 | 0.073  | 0.0005                         | 0.24                                                      | $1.6 \times 10^{-5}$                                    |

Variants within 10 kb of the coding sequences of *NCAN*, *TM6SF2*, and *SUGP1* genotyped using the ExomeChip array, with a minor allele frequency of >0.5%, and other variants at the 19p13 locus reported in previous GWAS, are listed in the table. Genotypes were coded as 0, 1, and 2 for wild-type homozygotes, heterozygotes, and variant allele homozygotes, respectively. Each SNP was tested for association with hepatic TG content using linear regression including ancestry, age, gender, and BMI as covariates. Conditional analysis was also adjusted for *TM6SF2* rs58542926 genotype. NA, not applicable.

**Supplementary Table 3 Association between *TM6SF2* (E167K) and hepatic triglyceride content (HTGC), liver enzymes and plasma lipid levels in Dallas Heart Study participants stratified by *TM6SF2* (E167K) genotype and (self-reported) ethnicity.**

| Trait                | Ethnicity                      | EE <sup>a</sup> | EK            | KK            | P-value <sup>b</sup>   |
|----------------------|--------------------------------|-----------------|---------------|---------------|------------------------|
| HTGC (%) mean        | DHS                            | 5.79 (0.14)     | 8.10 (0.60)   | 13.20 (2.63)  | 5.7 x 10 <sup>-8</sup> |
|                      | Non-Hispanic African-American  | 4.78 (0.17)     | 6.52 (0.86)   | 2.15 (-)      | 0.0058                 |
|                      | Non-Hispanic European-American | 5.86 (0.25)     | 8.63 (0.98)   | 15.04 (2.23)  | 2.7 x 10 <sup>-6</sup> |
| HTGC (%) median      | Hispanic                       | 8.35 (0.41)     | 9.14 (1.38)   | -             | 0.91                   |
|                      | DHS                            | 3.46 (2-7)      | 4.49 (2-10)   | 15.70 (9-18)  | 5.2 x 10 <sup>-5</sup> |
|                      | Non-Hispanic African-American  | 3.15 (2-5)      | 4.17 (2-7)    | 2.15 (-)      | 0.020                  |
| ALT (U)              | Non-Hispanic European-American | 3.50 (2-7)      | 4.29 (2-9)    | 16.87 (13-19) | 0.0044 <sup>6</sup>    |
|                      | Hispanic                       | 4.74 (3-11)     | 6.22 (3-13)   | -             | 0.77                   |
|                      | Non-Hispanic African-American  | 22 ± 20.1       | 23.3 ± 16.8   | 13.0 ± NA     | 0.78                   |
| AST (U)              | Non-Hispanic European-American | 23.7 ± 16.4     | 26.2 ± 18.5   | 32.4 ± 28.4   | 0.084                  |
|                      | Hispanic                       | 27.7 ± 25       | 30.7 ± 19.9   | -             | 0.015                  |
|                      | Non-Hispanic African-American  | 24.1 ± 17.3     | 25.5 ± 27.7   | 18.0 ± NA     | 0.19                   |
| ALP (U)              | Non-Hispanic European-American | 23.9 ± 17.4     | 24.4 ± 12.1   | 27.3 ± 17.5   | 0.95                   |
|                      | Hispanic                       | 25.7 ± 33       | 26.2 ± 12.6   | -             | 0.23                   |
|                      | Non-Hispanic African-American  | 72.6 ± 29       | 71.4 ± 21.3   | 61.0 ± NA     | 0.063                  |
| LDL (mg/dL)          | Non-Hispanic European-American | 66.6 ± 20.5     | 64.3 ± 20.4   | 63.4 ± 17.8   | 0.87                   |
|                      | Hispanic                       | 77.2 ± 26.3     | 71.3 ± 19.2   | -             | 0.12                   |
|                      | Non-Hispanic African-American  | 108.1 ± 37      | 101.7 ± 34.8  | 61.0 ± NA     | 0.033                  |
| Triglyceride (mg/dL) | Non-Hispanic European-American | 110.8 ± 34.9    | 108.7 ± 33.9  | 96.3 ± 41.2   | 0.22                   |
|                      | Hispanic                       | 108.7 ± 33.1    | 104.8 ± 33.6  | -             | 0.21                   |
|                      | Non-Hispanic African-American  | 107.2 ± 95.1    | 96.9 ± 55.2   | 67.0 ± NA     | 0.041                  |
| HDL (mg/dL)          | Non-Hispanic European-American | 136.2 ± 98.4    | 126.3 ± 76.6  | 132.2 ± 68    | 0.26                   |
|                      | Hispanic                       | 149.6 ± 118.7   | 144.6 ± 160.8 | -             | 0.46                   |
|                      | Non-Hispanic African-American  | 52.6 ± 15       | 52 ± 13.2     | 65.0 ± NA     | 0.85                   |
| HDL (mg/dL)          | Non-Hispanic European-American | 49.7 ± 15.4     | 49.5 ± 15.3   | 50.6 ± 19.2   | 0.76                   |
|                      | Hispanic                       | 46.4 ± 11.5     | 46.9 ± 11.5   | -             | 0.73                   |

Values are median (interquartile range, 1<sup>st</sup> – 3<sup>rd</sup> quartile) or mean (s.e.m) for HTGC, and mean  $\pm$  s.d. for all other traits. P-values for comparison of means were calculated using linear regression adjusted for age, gender, BMI and ancestry. P-values for median HTGC were determined using the Jonckheere-Terpstra rank test for trend. Ethnicity was self-reported as described in the Methods.

**Supplementary Table 4 Characteristics of the Dallas BioBank participants stratified by *TM6SF2* (E167K) genotype.**

| Characteristic                             | EE <sup>a</sup>  | EK               | KK               | P-value <sup>b</sup> |
|--------------------------------------------|------------------|------------------|------------------|----------------------|
| Total n                                    | 7,416            | 1,112            | 57               | -                    |
| Female, n (%)                              | 2,265 (30.5)     | 345 (31.0)       | 18 (31.6)        | 0.72                 |
| Age, years                                 | 53 $\pm$ 11      | 54 $\pm$ 11      | 54 $\pm$ 10      | 0.069                |
| Body-mass index, kg/m <sup>2</sup>         | 26.2 (24-29)     | 26.1 (24-29)     | 26.1 (24-29)     | 0.71                 |
| Diabetes <sup>c</sup> , n (%)              | 173 (2.3)        | 27 (2.4)         | 2 (3.5)          | 0.62                 |
| Lipid-lowering medication (statins), n (%) | 443 (6.0)        | 70 (6.3)         | 6 (10.5)         | 0.37                 |
| Fasting glucose (mg/dL) <sup>d</sup>       | 92 (87-98)       | 93 (88-99)       | 91 (86-96)       | 0.041                |
| Bilirubin (mg/dL)                          | 0.56 (0.40-0.76) | 0.56 (0.42-0.74) | 0.54 (0.39-0.76) | 0.71                 |
| HDL-cholesterol (mg/dL)                    | 57.1 $\pm$ 17.2  | 57.8 $\pm$ 16.7  | 56.3 $\pm$ 19.3  | 0.14                 |

Values are median (interquartile range), mean  $\pm$  s.d., or number (%). <sup>a</sup>Missense variant (E167K) in *TM6SF2*. <sup>b</sup>P-values were calculated using linear regression for continuous variables (age, body-mass index, glucose, HOMA-IR) and logistic regression for categorical variables (gender, ethnicity, diabetes diagnosis, alcohol consumption, and use of lipid-lowering drugs). Regression models were adjusted for age, gender, and BMI, where appropriate. <sup>c</sup>Diabetes was defined as a self-reported diagnosis of diabetes by a physician, use of prescription medication, fasting glucose  $\geq$  126 mg/dL or non-fasting glucose  $\geq$  200 mg/dL or HbA1c  $\geq$  6.5%. <sup>e</sup>Alcohol consumption was self-reported. <sup>d</sup>Diabetics excluded.

**Supplementary Table 5 Baseline characteristics of participants in the Copenhagen General Population Study and the Copenhagen City Heart Study combined (The Copenhagen Study), stratified by *TM6SF2* (E167K) genotype.**

| Characteristics                                      | EE              | EK <sup>a</sup> | KK              | P-value <sup>b</sup> |
|------------------------------------------------------|-----------------|-----------------|-----------------|----------------------|
| Total n                                              | 61,279          | 11,700          | 553             | -                    |
| Age, years                                           | 58 (47-67)      | 58 (47-67)      | 56 (45-66)      | 0.02                 |
| Female, n (%)                                        | 34,075 (56)     | 6,377 (55)      | 315 (57)        | 0.07                 |
| Body mass index, kg/m <sup>2</sup>                   | 26 (23-28)      | 26 (23-28)      | 25 (23-28)      | 0.14                 |
| Diabetes <sup>c</sup>                                | 3,025 (5)       | 588 (5)         | 34 (6)          | 0.40                 |
| Physical activity <sup>c</sup>                       | 28,858 (48)     | 5,459 (47)      | 267 (49)        | 0.60                 |
| Alcohol consumption <sup>c</sup>                     | 10,874 (18)     | 2,141 (18)      | 103 (19)        | 0.31                 |
| Gamma-glutamyltransferase, U/L                       | 28 (21-42)      | 28 (21-42)      | 28 (21-42)      | 0.16                 |
| Bilirubin, $\mu$ mol/L                               | 10 (8-13)       | 10 (8-13)       | 11 (8-14)       | 0.87                 |
| Lipid-lowering therapy <sup>c</sup> (statins), n (%) | 5,693 (9)       | 1,023 (9)       | 45 (8)          | 0.13                 |
| HDL (mg/dL)                                          | 62.2 $\pm$ 19.7 | 62.1 $\pm$ 19.6 | 62.6 $\pm$ 19.4 | 0.67                 |

Values are median (interquartile range), mean  $\pm$  s.d., or number (%). <sup>a</sup>Missense variant (E167K) in *TM6SF2*. <sup>b</sup>P-values were calculated using Kruskal-Wallis analysis of variance or Pearson's  $\chi^2$ -test. <sup>c</sup>Diabetes, physical activity in leisure time, alcohol consumption, and lipid-lowering therapy were self-reported, dichotomized, and defined as diabetes (self-reported disease, use of insulin, use of anti-diabetic medication, and/or non-fasting plasma glucose > 11.0 mmol/L) versus no diabetes, physical activity (four hours or more per week of light physical activity in leisure time versus less than four hours), alcohol consumption (>14/21 versus  $\leq$ 14/21 units per week in women/men; 1 unit=12g alcohol), and use of lipid-lowering drugs (yes/no), mainly statins (>97%).

**Supplementary Table 6. Primers used for amplification using the polymerase chain reaction**

| Sequence Amplified |   | Forward Primer        |   | Reverse Primer           |
|--------------------|---|-----------------------|---|--------------------------|
| TM6SF2-rs58542926  | 1 | GCATGGCACCAGCAGGTA    | 2 | CCTGCACCATGGAAGGCAAATA   |
| Mouse TM6SF2 cDNA  | 3 | CCTCGGTGGTGGACCTTG'   | 4 | TCCTTGGTGTAGAAATCCATGAAG |
| Human TM6SF2 cDNA  | 5 | GGCTGCCTATGCTCTCACCTT | 6 | TGCCTCCAGCAAACACCAA      |
